# Supplementary material for: Recapitulation of Human Embryonic Heartbeat to Promote Differentiation of Hepatic Endoderm to Hepatoblasts
Source: Front Bioeng Biotechnol. 2020 Sep 8;8:568092. doi: 10.3389/fbioe.2020.568092 (PMC7506096; doi:10.3389/fbioe.2020.568092)
Supplement: Supplementary file 4 [file Table_3.xlsx]

## Sheet: Sheet1
Supplemetary Table S3. P-values of Tukey-Kramer test for bioluminescent CYP3A assay shown in Figure 3C (95% family-wise confidence level)
Sample comparison	Difference	Lower	Upper	P-value
ai-af	-59.4419	-108.06	-10.8242	0.0113682
q-af	-77.136	-125.754	-28.5183	0.000996
t-af	-114.331	-162.949	-65.7135	9.9e-06
x-af	-156.752	-205.37	-108.134	1e-07
aa-af	-176.024	-224.642	-127.406	0
at-af	-155.093	-203.71	-106.475	2e-07
au-af	-273.635	-322.252	-225.017	0
q-ai	-17.6941	-66.3118	30.9236	0.900751
t-ai	-54.8893	-103.507	-6.27157	0.0213397
x-ai	-97.3101	-145.928	-48.6924	7.35e-05
aa-ai	-116.582	-165.2	-67.9642	7.7e-06
at-ai	-95.6508	-144.268	-47.0331	9.02e-05
au-ai	-214.193	-262.811	-165.575	0
t-q	-37.1952	-85.8129	11.4225	0.208307
x-q	-79.616	-128.234	-30.9983	0.0007142
aa-q	-98.8878	-147.506	-50.2701	6.05e-05
at-q	-77.9567	-126.574	-29.339	0.0008919
au-q	-196.499	-245.116	-147.881	0
x-t	-42.4208	-91.0385	6.19685	0.11156
aa-t	-61.6926	-110.31	-13.0749	0.0083161
at-t	-40.7615	-89.3792	7.8562	0.136894
au-t	-159.304	-207.921	-110.686	1e-07
aa-x	-19.2718	-67.8895	29.3459	0.856815
at-x	1.65935	-46.9584	50.277	1
au-x	-116.883	-165.5	-68.265	7.4e-06
at-aa	20.9311	-27.6866	69.5488	0.801733
au-aa	-97.611	-146.229	-48.9933	7.08e-05
au-at	-118.542	-167.16	-69.9244	6.2e-06
	Presssure & Distance	45 kPa 10.4 mm	45 kPa 21.5 mm	32 kPa 10.4 mm	32 kPa 21.5 mm	32 kPa 34.6 mm	32 kPa 42.7 mm	no stimuli	Definitive endoderm
	sample label	af	ai	q	t	x	aa	at	au
